# Supplementary material for: Adaptation, Academic Performance and Support: Students with and without Disabilities and Future Considerations for Counselling Psychology
Source: MDPI journal article supplement (doi:10.3390/bs13100862), 2023-10-20
Supplement: s1 [file s1]

**Table S1.** Demographic characteristics of the sample by group.

| Demographic Variable           | Disability ( <i>n</i> = 127) | Non-Disability ( <i>n</i> = 127) | Total ( <i>n</i> = 254)    |
|--------------------------------|------------------------------|----------------------------------|----------------------------|
| Gender:                        |                              |                                  |                            |
| Male                           | 43.3% ( <i>n</i> = 55)       | 44.9% ( <i>n</i> = 57)           | 44.1% ( <i>n</i> = 112)    |
| Female                         | 56.7% ( <i>n</i> = 72)       | 55.1% ( <i>n</i> = 70)           | 55.9% ( <i>n</i> = 142)    |
| Nationality:                   |                              |                                  |                            |
| Cypriots                       | 55.9% ( <i>n</i> = 71)       | 45.7% ( <i>n</i> = 58)           | 50.8% ( <i>n</i> = 129)    |
| Greeks                         | 44.1% ( <i>n</i> = 56)       | 54.3% ( <i>n</i> = 69)           | 49.2% ( <i>n</i> = 125)    |
| Residence Status:              |                              |                                  |                            |
| Living Alone                   | 38.6% ( <i>n</i> = 49)       | 55.1% ( <i>n</i> = 70)           | 46.9% ( <i>n</i> = 119)    |
| Living with Partner            | 13.4% ( <i>n</i> = 17)       | 7.1% ( <i>n</i> = 9)             | 10.2% ( <i>n</i> = 26)     |
| Living with Parents            | 43.3% ( <i>n</i> = 55)       | 23.6% ( <i>n</i> = 30)           | 33.5% ( <i>n</i> = 85)     |
| Living with Roommates          | 4.7% ( <i>n</i> = 6)         | 14.2% ( <i>n</i> = 18)           | 9.4% ( <i>n</i> = 24)      |
| Level of Study:                |                              |                                  |                            |
| Bachelor                       | 81.9% ( <i>n</i> = 104)      | 89.8% ( <i>n</i> = 114)          | 85.8% ( <i>n</i> = 218)    |
| Master                         | 16.5% ( <i>n</i> = 21)       | 10.2% ( <i>n</i> = 13)           | 13.4% ( <i>n</i> = 34)     |
| Doctorate                      | 1.6% ( <i>n</i> = 2)         | 0                                | 0.8% ( <i>n</i> = 2)       |
| Program of Study:              |                              |                                  |                            |
| Medicine                       | 16.5% ( <i>n</i> = 21)       | 9.4% ( <i>n</i> = 12)            | 13% ( <i>n</i> = 33)       |
| Sciences                       | 18.9% ( <i>n</i> = 24)       | 28.3% ( <i>n</i> = 36)           | 23.6% ( <i>n</i> = 60)     |
| Social Sciences and Humanities | 33.1% ( <i>n</i> = 42)       | 40.9% ( <i>n</i> = 52)           | 37% ( <i>n</i> = 94)       |
| Education                      | 7.9% ( <i>n</i> = 10)        | 3.1% ( <i>n</i> = 4)             | 5.5% ( <i>n</i> = 14)      |
| Business                       | 11% ( <i>n</i> = 14)         | 11.8% ( <i>n</i> = 15)           | 11.4% ( <i>n</i> = 29)     |
| Law                            | 12.6% ( <i>n</i> = 16)       | 6.3% ( <i>n</i> = 8)             | 9.4% ( <i>n</i> = 24)      |
| Year of Study:                 |                              |                                  |                            |
| First                          | 26.8% ( <i>n</i> = 34)       | 26.8% ( <i>n</i> = 34)           | 26.8% ( <i>n</i> = 68)     |
| Second                         | 23.6% ( <i>n</i> = 30)       | 24.4% ( <i>n</i> = 31)           | 24% ( <i>n</i> = 61)       |
| Third                          | 20.5% ( <i>n</i> = 26)       | 18.1% ( <i>n</i> = 23)           | 19.3% ( <i>n</i> = 49)     |
| Fourth                         | 13.4% ( <i>n</i> = 17)       | 24.4% ( <i>n</i> = 31)           | 18.9% ( <i>n</i> = 48)     |
| Fifth and above                | 15.7% ( <i>n</i> = 20)       | 6.3% ( <i>n</i> = 8)             | 11% ( <i>n</i> = 28)       |
| Mean Age                       | 21.34 ( <i>SD</i> = 1.97)    | 20.69 ( <i>SD</i> = 1.78)        | 21.02 ( <i>SD</i> = 1.90)  |
| Mean Grade Point Average       | 2.65 ( <i>SD</i> = 0.91)     | 3.14 ( <i>SD</i> = 0.64)         | 2.89 ( <i>SD</i> = 0.82)   |
| Mean University Adaptation     | 64.65 ( <i>SD</i> = 9.99)    | 87.50 ( <i>SD</i> = 18.17)       | 76.08 ( <i>SD</i> = 18.58) |

**Table S2.** Disability group demographic information.

| <b>Demographic Variable</b>                 | <b>SWD (<i>n</i> = 127)</b> |
|---------------------------------------------|-----------------------------|
| Disability Type:                            |                             |
| Learning                                    | 62.2% ( <i>n</i> = 79)      |
| ADHD                                        | 7.9% ( <i>n</i> = 10)       |
| Auditory                                    | 8.7% ( <i>n</i> = 11)       |
| Mobility                                    | 3.1% ( <i>n</i> = 4)        |
| Health Problems                             | 11% ( <i>n</i> = 14)        |
| Mental Health Problems                      | 7.1% ( <i>n</i> = 9)        |
| Comorbidity:                                |                             |
| Yes                                         | 15% ( <i>n</i> = 19)        |
| No                                          | 85% ( <i>n</i> = 108)       |
| Psychological Therapy:                      |                             |
| Yes, in the past                            | 29.9% ( <i>n</i> = 38)      |
| Yes, currently                              | 22.8% ( <i>n</i> = 29)      |
| Never                                       | 47.2% ( <i>n</i> = 60)      |
| Mode of Study:                              |                             |
| Conventional Study                          | 81.1% ( <i>n</i> = 103)     |
| Distance Learning                           | 18.9% ( <i>n</i> = 24)      |
| Teaching Accommodations:                    |                             |
| Basic                                       | 79.5% ( <i>n</i> = 101)     |
| Combination                                 | 20.5% ( <i>n</i> = 26)      |
| Exams Accommodations:                       |                             |
| Basic                                       | 49.6% ( <i>n</i> = 63)      |
| Special                                     | 7.1% ( <i>n</i> = 9)        |
| Combination                                 | 43.3% ( <i>n</i> = 55)      |
| Beliefs about Extra<br>Specialized Package: |                             |
| Positive                                    | 62.2% ( <i>n</i> = 79)      |
| Negative                                    | 37.8% ( <i>n</i> = 48)      |

**Table S3.** Mann–Whitney U tests for differences in GPA and adaptation between students with and without disabilities (significance level  $p < 0.05$ ).

| Independent Variable          | N   | GPA    |        |       |       | Adaptation |        |        |       |
|-------------------------------|-----|--------|--------|-------|-------|------------|--------|--------|-------|
|                               |     | Median | U      | Z     | Sig   | Median     | U      | Z      | Sig   |
| Students without Disabilities | 127 | 148.10 | 10.681 | 4.472 | 0.001 | 174.23     | 13.999 | 10.140 | 0.001 |
| Students with Disabilities    | 127 | 106.90 |        |       |       | 80.77      |        |        |       |

**Table S4.** Kruskal–Wallis H test for differences between SWD in GPA and adaptation according to the type of disability (significance level  $p < 0.05$ ).

| Independent Variable   | N  | GPA       |        |    |       | Adaptation |       |    |       |
|------------------------|----|-----------|--------|----|-------|------------|-------|----|-------|
|                        |    | Mean Rank | H      | df | Sig   | Mean Rank  | H     | df | Sig   |
| Learning Disabilities  | 79 | 56.90     | 13.727 | 5  | 0.017 | 61.64      | 4.610 | 5  | 0.465 |
| ADHD                   | 10 | 63.50     |        |    |       | 61.55      |       |    |       |
| Auditory Disabilities  | 11 | 72.82     |        |    |       | 54.41      |       |    |       |
| Mobility Disabilities  | 4  | 114.75    |        |    |       | 79.00      |       |    |       |
| Health Problems        | 14 | 78.79     |        |    |       | 77.75      |       |    |       |
| Mental Health Problems | 9  | 70.56     |        |    |       | 74.61      |       |    |       |

**Table S5.** Mann–Whitney U tests for differences between SWD in GPA and adaptation according to disability comorbidity (significance level  $p < 0.05$ ).

| Independent Variable    | N   | GPA    |       |       |       | Adaptation |       |       |       |
|-------------------------|-----|--------|-------|-------|-------|------------|-------|-------|-------|
|                         |     | Median | U     | Z     | Sig   | Median     | U     | Z     | Sig   |
| SWD with Comorbidity    | 19  | 47.45  | 1.340 | 2.126 | 0.034 | 50.34      | 1.285 | 1.756 | 0.079 |
| SWD without Comorbidity | 108 | 66.91  |       |       |       | 66.40      |       |       |       |

**Table S6.** Mann–Whitney U tests for differences between SWD in GPA and adaptation according to the type of teaching academic accommodations (significance level  $p < 0.05$ ).

| Independent Variable | N   | GPA    |       |       |       | Adaptation |       |       |       |
|----------------------|-----|--------|-------|-------|-------|------------|-------|-------|-------|
|                      |     | Median | U     | Z     | Sig   | Median     | U     | Z     | Sig   |
| Basic                | 101 | 62.10  | 1.504 | 1.144 | 0.252 | 63.06      | 1.408 | 0.568 | 0.570 |
| Combination          | 26  | 71.37  |       |       |       | 67.65      |       |       |       |

**Table S7.** Kruskal–Wallis H test for differences between SWD in GPA and adaptation according to the type of exam accommodations (significance level  $p < 0.05$ ).

| Independent Variable | N  | GPA       |       |    |       | Adaptation |       |    |       |
|----------------------|----|-----------|-------|----|-------|------------|-------|----|-------|
|                      |    | Mean Rank | H     | df | Sig   | Mean Rank  | H     | df | Sig   |
| Basic                | 63 | 54.97     | 8.045 | 2  | 0.018 | 59.88      | 1.737 | 2  | 0.420 |
| Special              | 9  | 81.06     |       |    |       | 63.39      |       |    |       |
| Combination          | 55 | 71.55     |       |    |       | 68.82      |       |    |       |

**Table S8.** Kruskal–Wallis H test for differences between SWD in GPA and adaptation according to the existence of therapy (significance level  $p < 0.05$ ).

| Independent Variable | N  | GPA       |       |    |       | Adaptation |       |    |       |
|----------------------|----|-----------|-------|----|-------|------------|-------|----|-------|
|                      |    | Mean Rank | H     | df | Sig   | Mean Rank  | H     | df | Sig   |
| Past Therapy         | 38 | 60.28     | 3.409 | 2  | 0.182 | 62.92      | 1.517 | 2  | 0.468 |
| Present Therapy      | 29 | 75.07     |       |    |       | 71.26      |       |    |       |
| Non-users of Therapy | 60 | 61.01     |       |    |       | 61.18      |       |    |       |

**Table S9.** Mann–Whitney U tests for differences between SWD in GPA and adaptation according to their perceptions of a specialized package of counselling psychology interventions (significance level  $p < 0.05$ ).

| Independent Variable | N  | GPA    |       |        |       | Adaptation |       |        |       |
|----------------------|----|--------|-------|--------|-------|------------|-------|--------|-------|
|                      |    | Median | U     | Z      | Sig   | Median     | U     | Z      | Sig   |
| Positive Perceptions | 79 | 64.32  | 1.871 | -0.124 | 0.901 | 69.41      | 1.469 | -2.125 | 0.034 |
| Negative Perceptions | 48 | 63.48  |       |        |       | 55.10      |       |        |       |
